# Supplementary material
Source: PubMed Central journal article supplement (PMC4730568)
Supplement: IAI.01267-15_zii999091563so1.pdf [file IAI.01267-15_zii999091563so1.pdf]

**Supplemental Figure S1.** pEHNspA prepared from pUC19 by cloning an NspA gene from serogroup W strain Su 1/06 (1), an upstream previously described EH promoter (1), and an ampicillin resistance marker. The NspA gene included its natural signal peptide coding segment for surface expression in *E. coli*.

## **Reference**

1. **Pajon R, Fergus AM, and Granoff DM.** 2013. Mutant native outer membrane vesicles combined with a serogroup A polysaccharide conjugate vaccine for prevention of meningococcal epidemics in Africa. *PLoS One* **8**:e66536.
