# Supplementary material
Source: PubMed Central journal article supplement (PMC4730568)

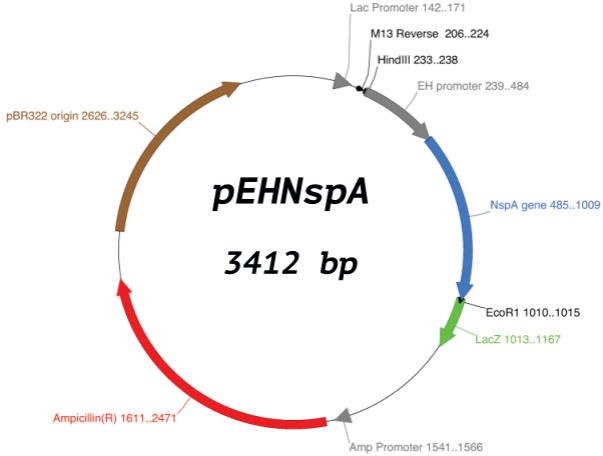

Supplement: IAI.01267-15_zii999091563so2.pdf [file IAI.01267-15_zii999091563so2.pdf]
